# Supplementary material for: Efficient synthesis of niobium pentoxide nanowires and application in ethanolysis of furfuryl alcohol
Source: Royal Society of Chemistry journal article supplement (doi:10.1039/d0ra00085j), 2020-01-01
Supplement: d0ra00085j1.pdf [file d0ra00085j1.pdf]

## Supplementary information

### Efficient synthesis of Niobium pentoxide nanowires and application in ethanolysis of furfuryl alcohol

Zhenwei Zhang,<sup>\*a</sup> Peng Wang,<sup>b</sup> Zeying Wu,<sup>a</sup> Chuanjun Yue,<sup>a</sup> Xuejiao Wei,<sup>a</sup> Jiwei Zheng,<sup>a</sup> Mei Xiang,<sup>a</sup>  
Baoliang Liu<sup>a</sup>

<sup>a</sup>Changzhou Institute of Technology, School of Chemical Engineering and Materials, Changzhou,  
Jiangsu, 213022

<sup>b</sup>Jiangsu Key Laboratory of Advanced Catalytic Materials and Technology, School of Petrochemical  
Engineering, Changzhou University, Changzhou, Jiangsu, 213164

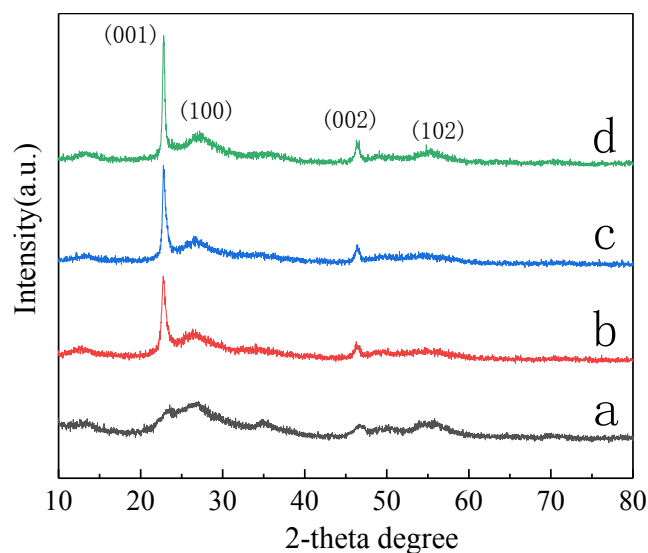

Figure S1 XRD analysis of Nb<sub>2</sub>O<sub>5</sub> nanomaterials after different reaction time (a. 5h, b 10h, c 15h, d 25h.)

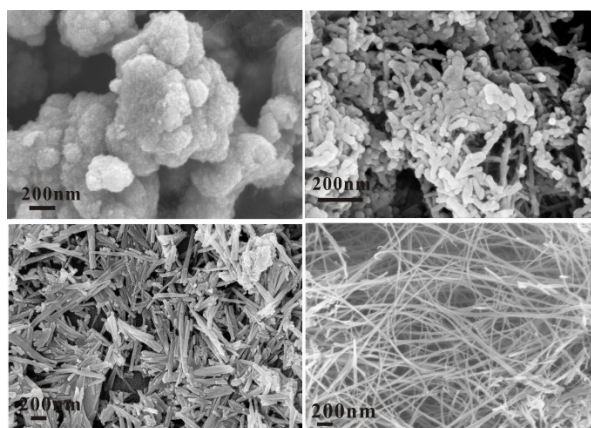

Figure S2 SEM analysis of Nb<sub>2</sub>O<sub>5</sub> nanomaterials after different reaction time (a. 5h, b 10h, c 15h, d 25h.)

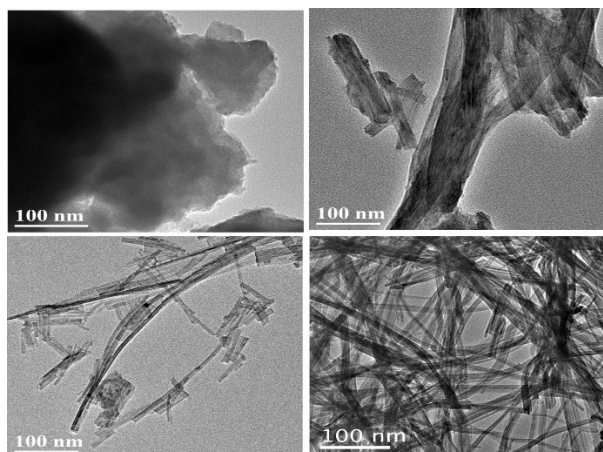

Figure S3 TEM analysis of Nb<sub>2</sub>O<sub>5</sub> nanomaterials after different reaction time (a. 5h, b 10h, c 15h, d 25h.)

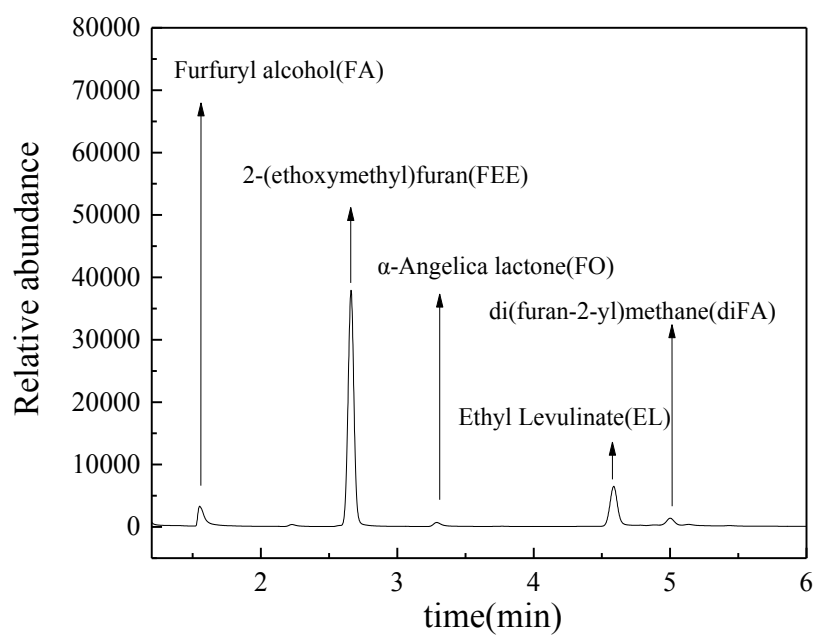

Figure S4. Gas chromatograph of the ethanolysis reaction

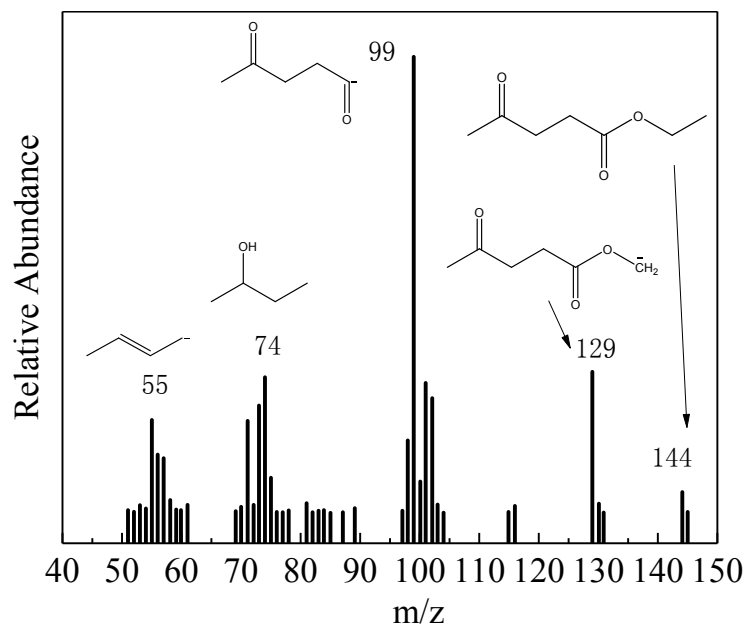

Figure S5. Mass spectrometry analysis of EL

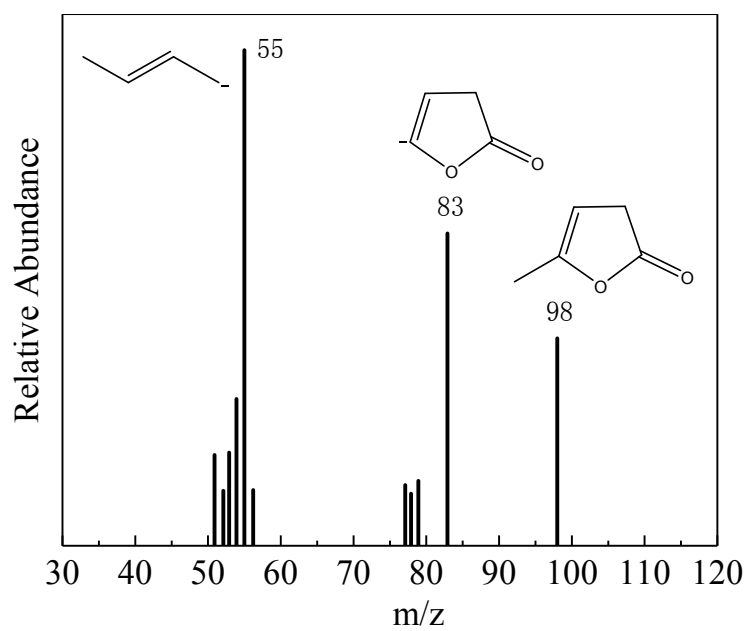

Figure S6. Mass spectrometry analysis of FO

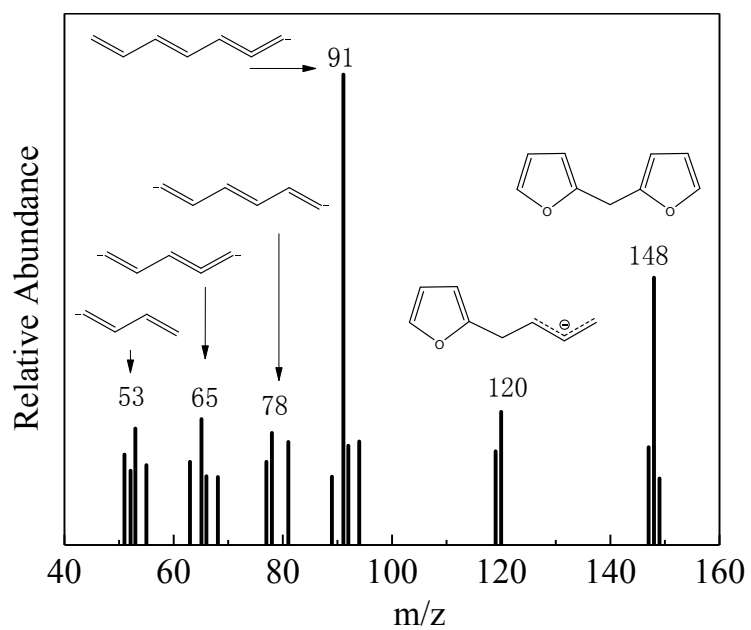

Figure S7. Mass spectrometry analysis of diFA

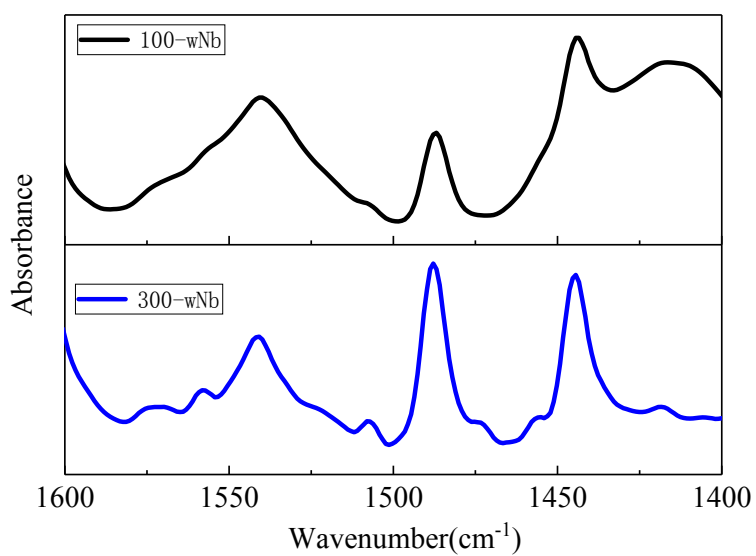

Figure S8 pyridine infrared spectroscopy analysis of 100-wNb, 300-wNb.
